# Supplementary material for: Sensing properties and photochromism of Ag–TiO2nano-heterostructures
Source: Royal Society of Chemistry journal article supplement (doi:10.1039/c6ta03760g), 2016-01-01
Supplement: c6ta03760g1.pdf [file c6ta03760g1.pdf]

*Electronic Supplementary Information*

## Sensing properties and photochromism of Ag-TiO<sub>2</sub> nano-heterostructures

D.M. Tobaldi,<sup>a\*</sup> S.G. Leonardi,<sup>b</sup> R.C. Pullar,<sup>a</sup> M.P. Seabra,<sup>a</sup> G. Neri,<sup>b</sup> J.A. Labrincha<sup>a</sup>

<sup>a</sup> *Department of Materials and Ceramic Engineering / CICECO–Aveiro Institute of Materials, University of Aveiro,  
Campus Universitário de Santiago, 3810-193 Aveiro, Portugal*

<sup>b</sup> *Department of Engineering, University of Messina, C.da Di Dio, 98166 Messina, Italy*

\* Corresponding author. Tel.: +351 234 370 041

E-mail addresses: [david.tobaldi@ua.pt](mailto:david.tobaldi@ua.pt); [david@davidtobaldi.org](mailto:david@davidtobaldi.org)

Electronic Supplementary Information

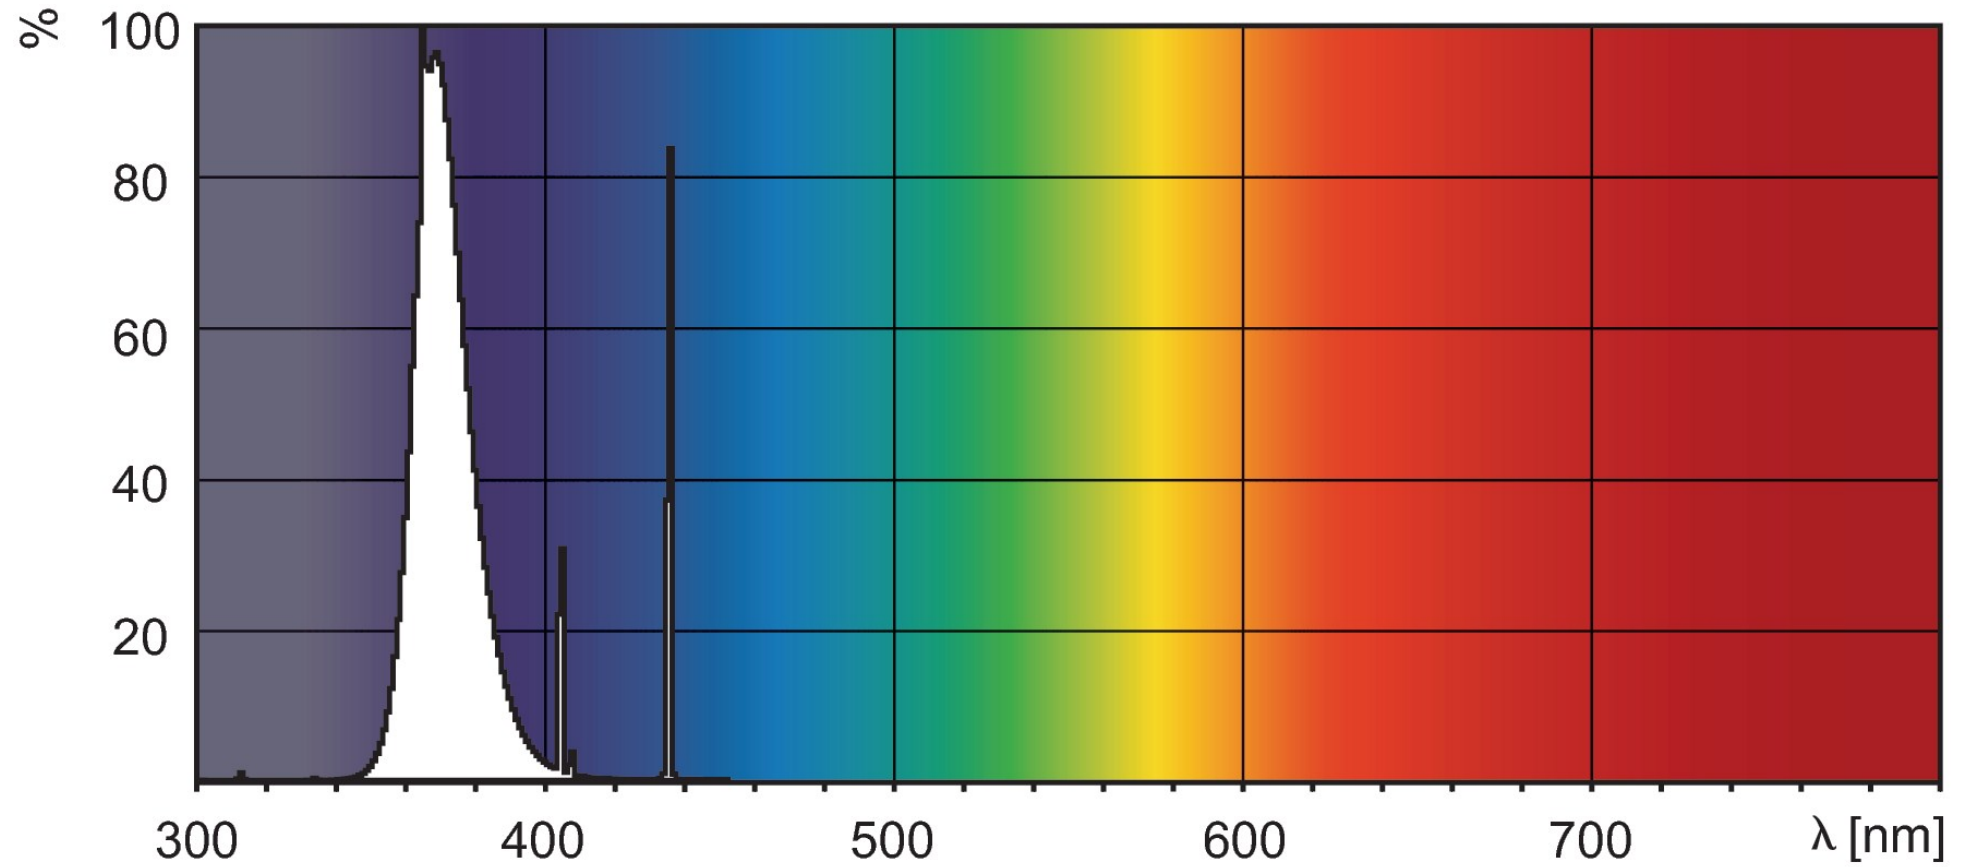

Fig. S1 – Emission spectrum of the UVA-lamp used, from [www.philips.com](http://www.philips.com)

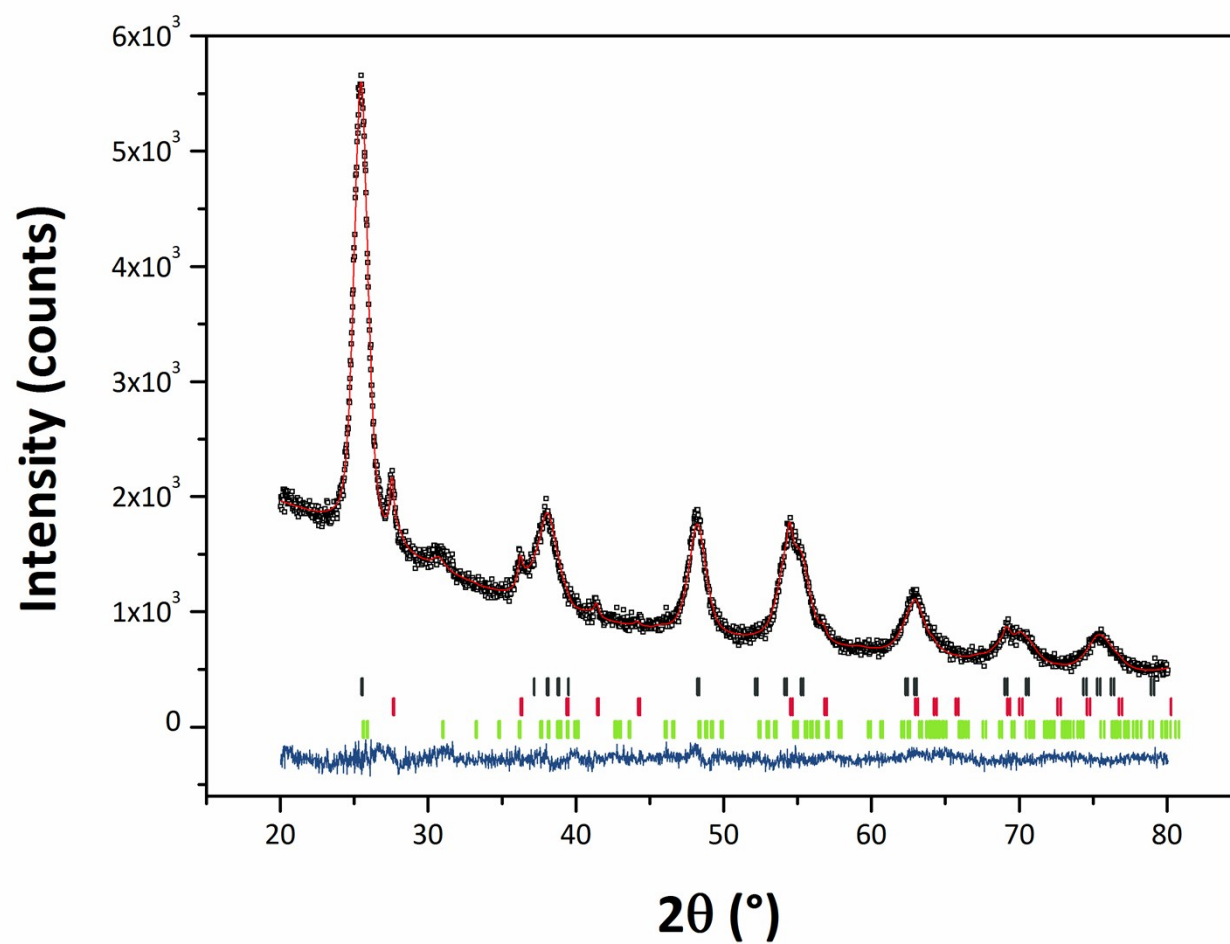

**Fig.S2** – Graphic output of the Rietveld refinement of the sample **2Ag-Ti450**. The black open squares represent the observed pattern, the red line represents the calculated pattern, and the difference curve between observed and calculated profiles is plotted below. The position of reflections is indicated by the small vertical bars (black: anatase; red: rutile; green, brookite).

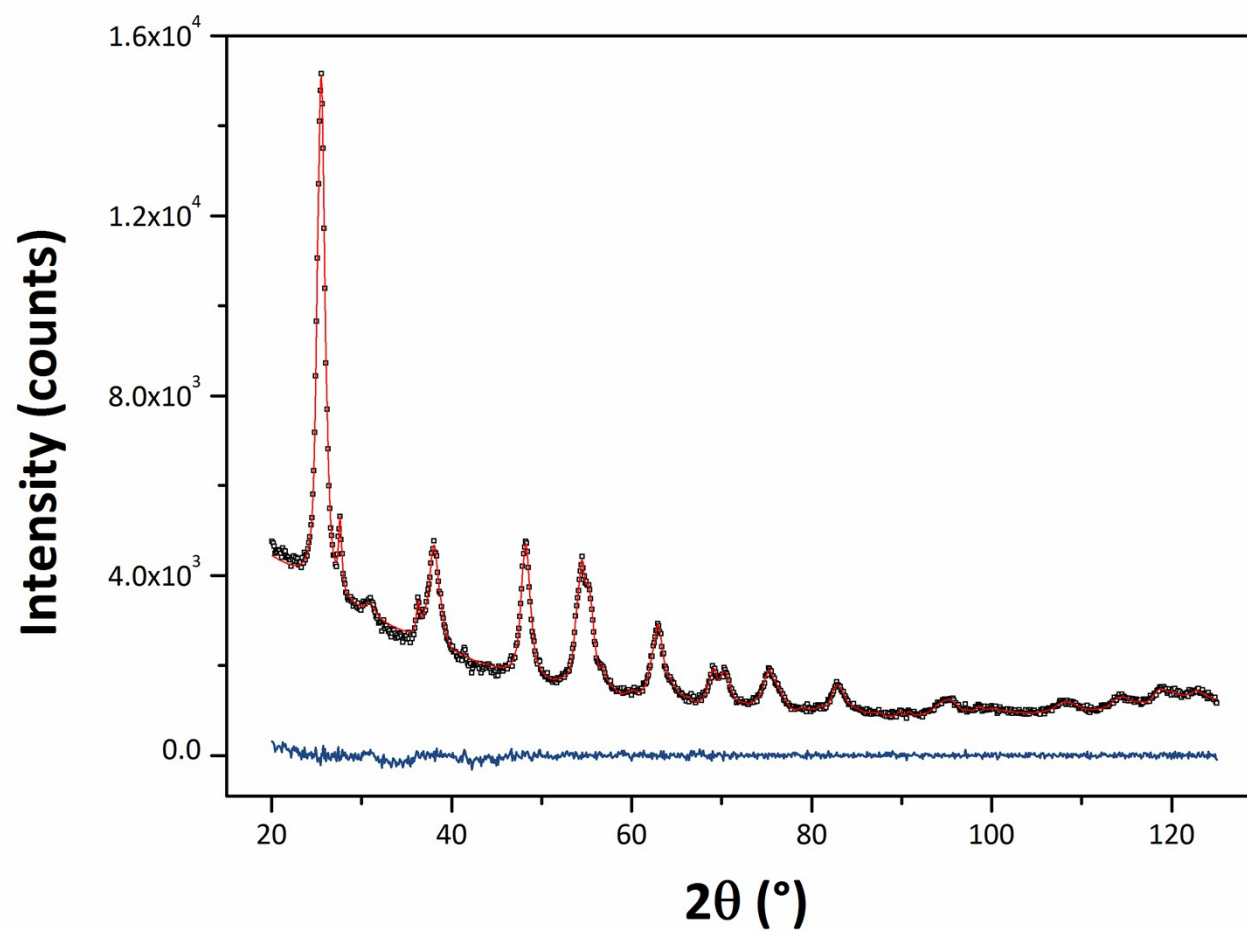

**Fig. S3** – Graphic output of the WPPM modelling (sample **Ag-Ti450**). The black open squares represent the observed data, the red continuous line the calculated data. The blue continuous line in the bottom shows the difference curve between observed and calculated profile.

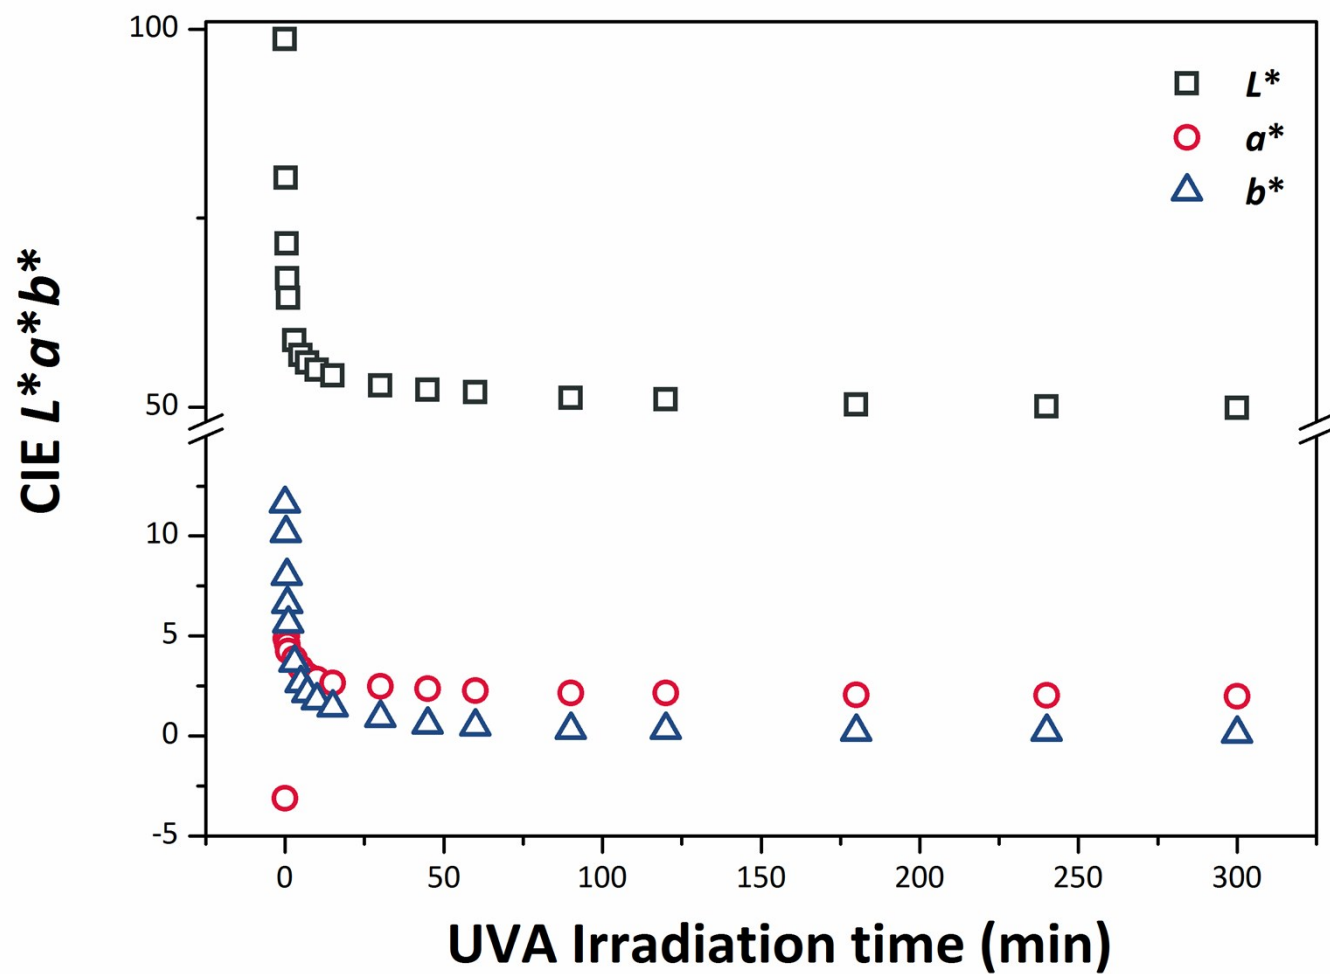

Fig. S4a – Change in the CIE  $L^*a^*b^*$  colour coordinates in selected Ag-modified  $\text{TiO}_2$  samples with UVA-light exposure time, specimen **Ag-Ti450**.

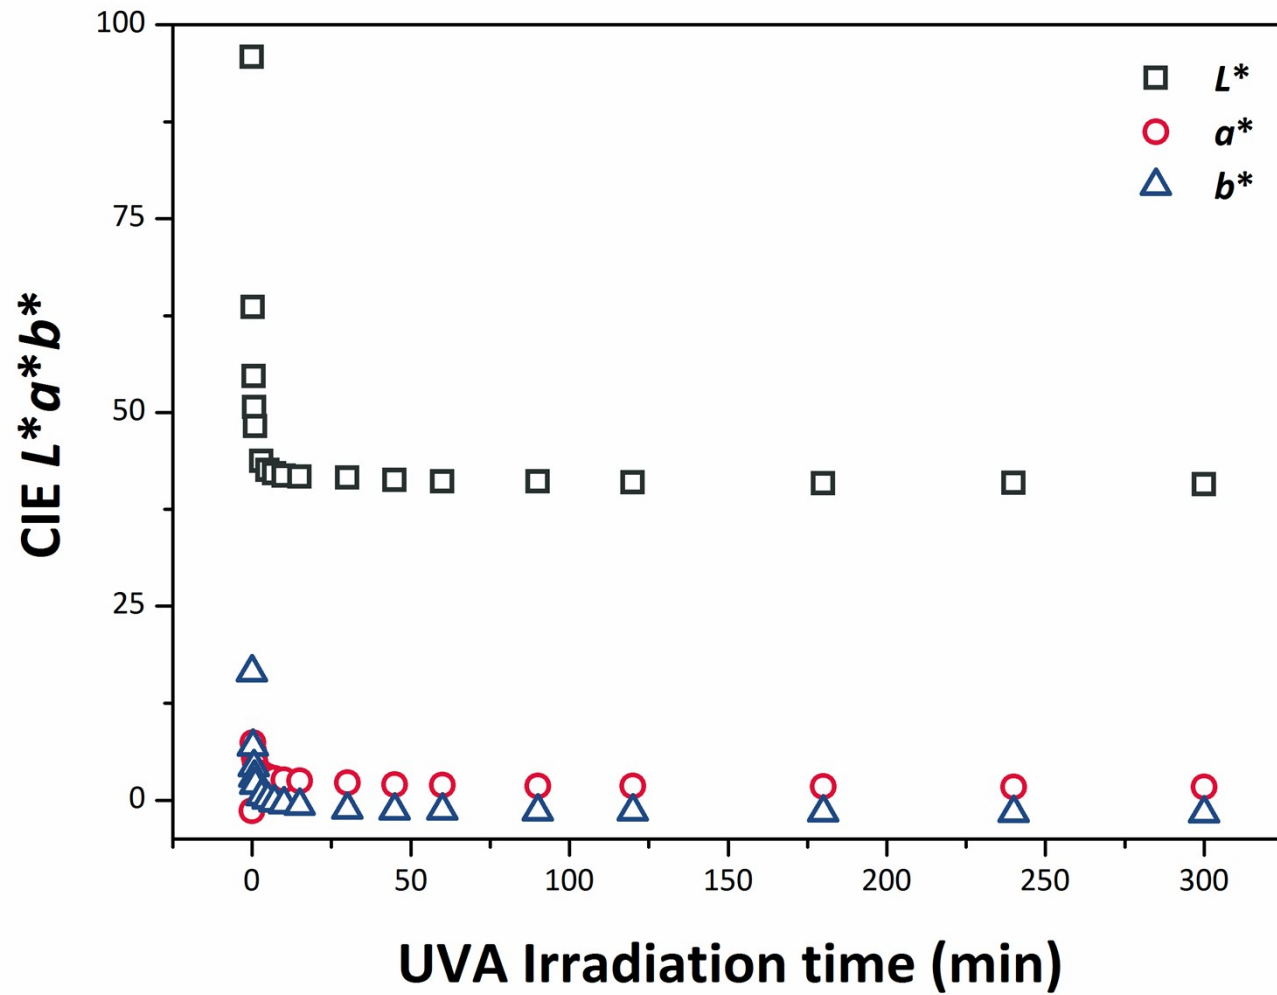

Fig. S4b – Change in the CIE  $L^*a^*b^*$  colour coordinates in selected Ag-modified  $\text{TiO}_2$  samples with UVA-light exposure time, specimen **2Ag-Ti450**.

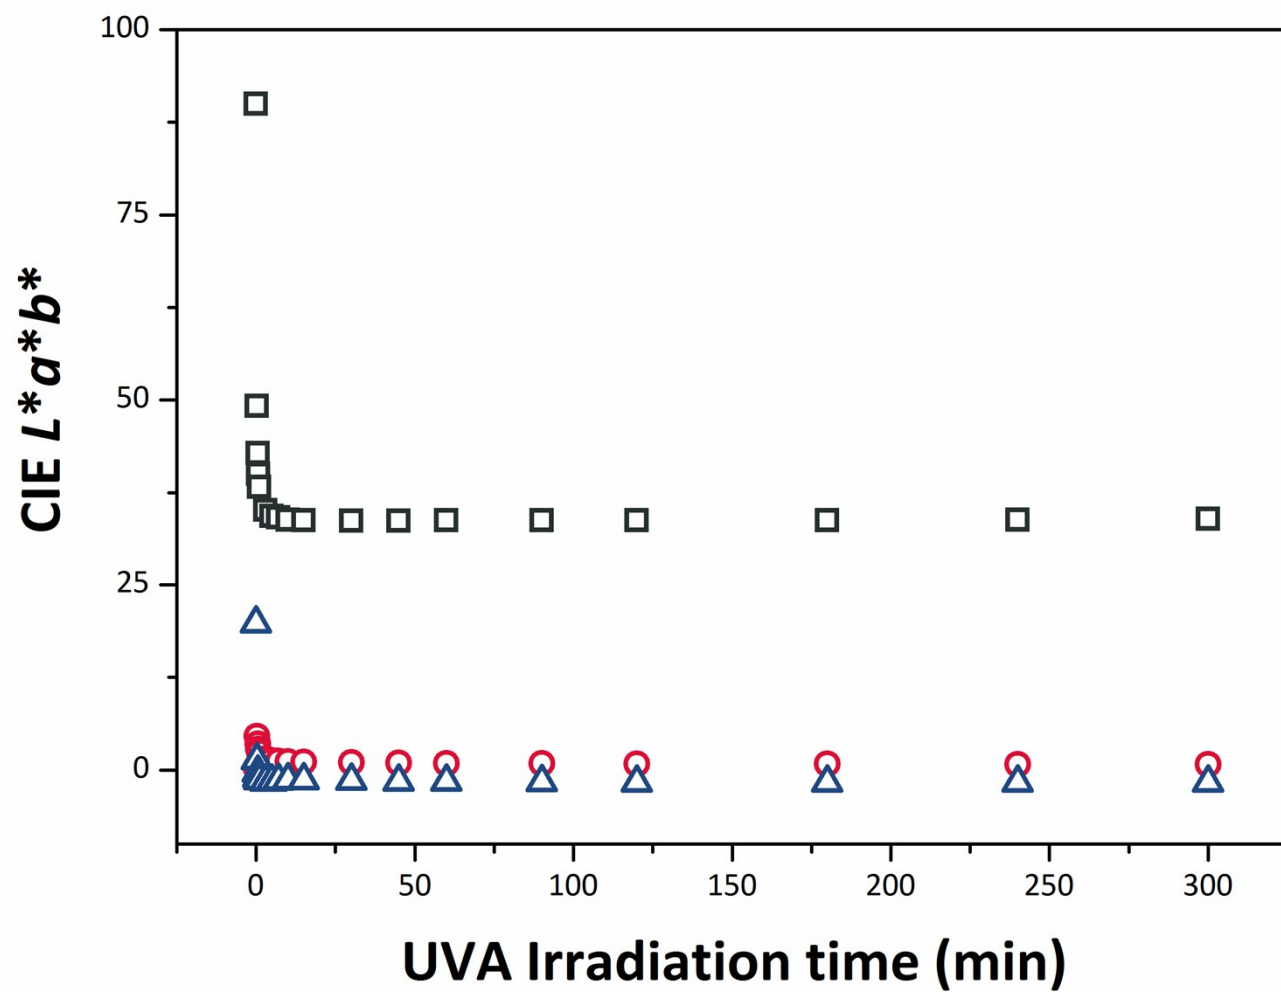

Fig. S4c – Change in the CIE L\*a\*b\* colour coordinates in selected Ag-modified TiO<sub>2</sub> samples with UVA-light exposure time, specimen 5Ag-Ti450.
